# Supplementary material for: MXene-based Ti2C/Ta2C lateral heterostructure: an intrinsic room temperature ferromagnetic material with large magnetic anisotropy
Source: Royal Society of Chemistry journal article supplement (doi:10.1039/d3ra03343k), 2023-01-01
Supplement: d3ra03343k1.pdf [file d3ra03343k1.pdf]

## SUPPLEMENTARY INFORMATION

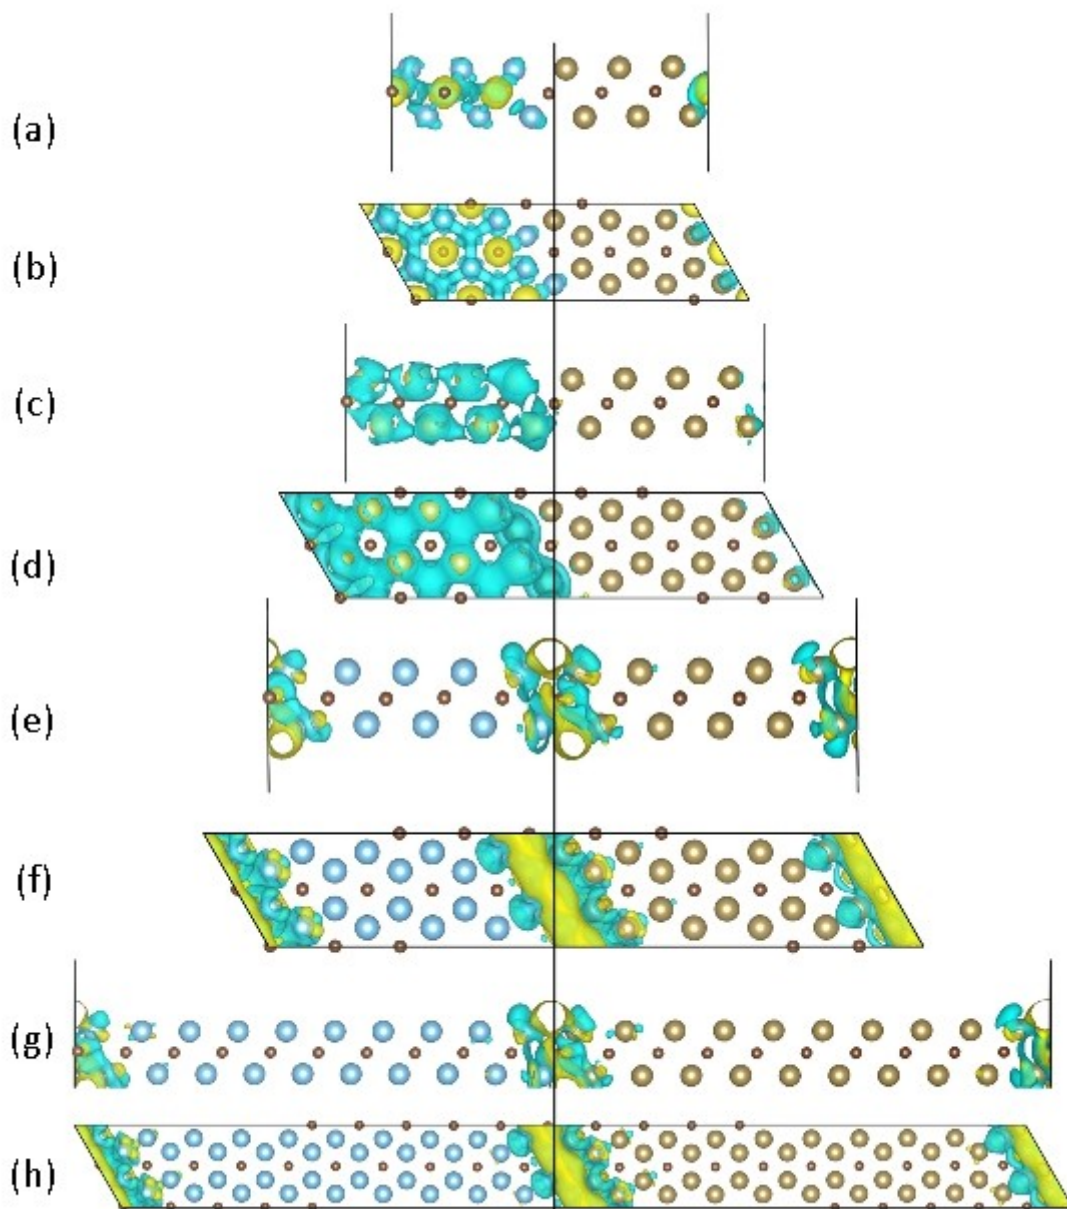

Fig. S1. (a-c-e-g) Side and (b-d-f-h) top views of the charge density difference for the  $(\text{Ti}_2\text{C})_p/(\text{Ta}_2\text{C})_q$   $p=q = 3,4,5,10$ , respectively.

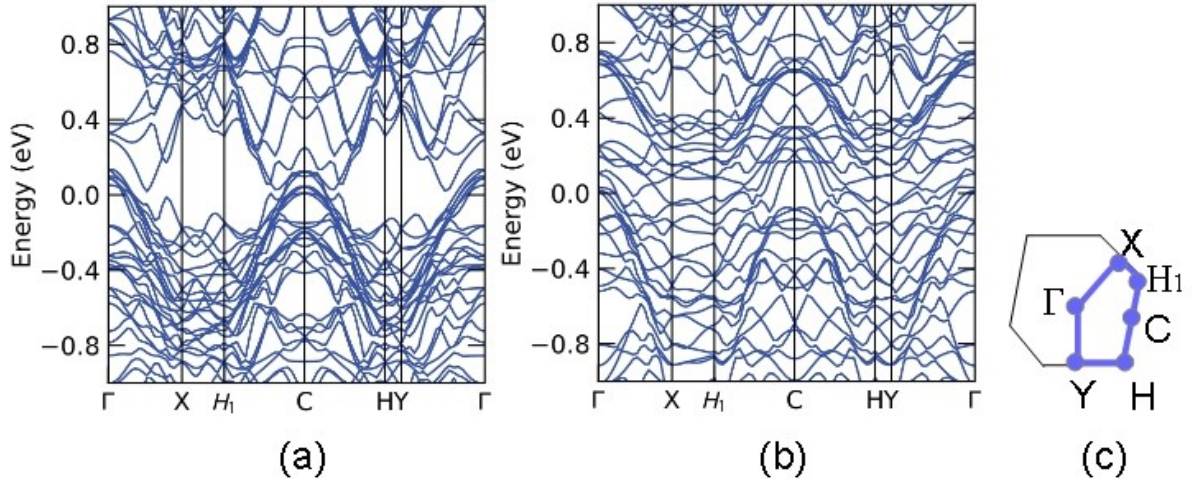

Fig. S2. (a) Spin up, and (b) spin down band structures of  $(\text{Ti}_2\text{C})_3/(\text{Ta}_2\text{C})_3$ . The Fermi level is set at 0 eV. (c) High symmetry points in the Brillouin zone of  $(\text{Ti}_2\text{C})_3/(\text{Ta}_2\text{C})_3$ .

Table S1. The total energy values determining the energy cutoff for  $(\text{Ti}_2\text{C})_3/(\text{Ta}_2\text{C})_3$ .

| Encut (eV) | Energy (eV) |
|------------|-------------|
| 450        | -279.36617  |
| 550        | -279,33973  |
| 650        | -279,36160  |
| 750        | -279,37616  |
| 850        | -279,37900  |

In this paper, the chosen 450 eV plane wave cutoff energy is based on the energy difference becoming of the order of  $1 \times 10^{-2}$  eV. The total energies reported in the table are calculated for the  $(\text{Ti}_2\text{C})_3/(\text{Ta}_2\text{C})_3$ , using spin-polarized calculation.
